# Supplementary material for: A cationic lipid mediated CRISPR/Cas9 technique for the production of stable genome edited citrus plants
Source: PubMed Central journal article supplement (PMC8932238; doi:10.1186/s13007-022-00870-6), 2022-03-18
Supplement: 13007_2022_870_MOESM1_ESM.pdf [file 13007_2022_870_MOESM1_ESM.pdf]

Additional file 1: Table S1: Primer sequences used in this study.

| <b>Seq Name</b> | <b>Purpose</b>  |         | <b>Primer sequences 5'→3'</b> |
|-----------------|-----------------|---------|-------------------------------|
| <i>CsNPR3</i>   | qPCR            | Forward | TCCTTGCTCAATGTGTTGATAGA       |
|                 |                 | Reverse | AAGACTTGAGTCGGAGCATTTC        |
| <i>CsNPR1</i>   | qPCR            | Forward | GTAGGCCGGCTGTTGATTT           |
|                 |                 | Reverse | GTCTAGGAGGTGCCTCTGATAA        |
| <i>CsPR1</i>    | qPCR            | Forward | CAGGGTCTCCAAGCAACTATG         |
|                 |                 | Reverse | CCACCTCGCGTATTTCTCTAA         |
| <i>CsActin</i>  | qPCR            | Forward | GCTGCCTGATGGCCAGATC           |
|                 |                 | Reverse | AGTTGTAGGTAGTCTCATGAA         |
| Cas9            | PCR             | Forward | GAAGCAGCTCAAAGAGGACTAC        |
|                 |                 | Reverse | GCTCTTGGTCCACGTACATATC        |
| EGFP            | PCR             | Forward | CAAGACCAGAGCTGAGGTTAAG        |
|                 |                 | Reverse | GGATGTTTCCGTCCTCTTTGA         |
| <i>CsNPR3</i>   | T7EI/Sequencing | Forward | TTGGCTGCCTTCCATTGTCAATTAA     |
|                 |                 | Reverse | GAGTGCATTGGCTTCGTCTAAGG       |
