# Supplementary material for: A cationic lipid mediated CRISPR/Cas9 technique for the production of stable genome edited citrus plants
Source: PubMed Central journal article supplement (PMC8932238; doi:10.1186/s13007-022-00870-6), 2022-03-18
Supplement: 13007_2022_870_MOESM3_ESM.pdf [file 13007_2022_870_MOESM3_ESM.pdf]

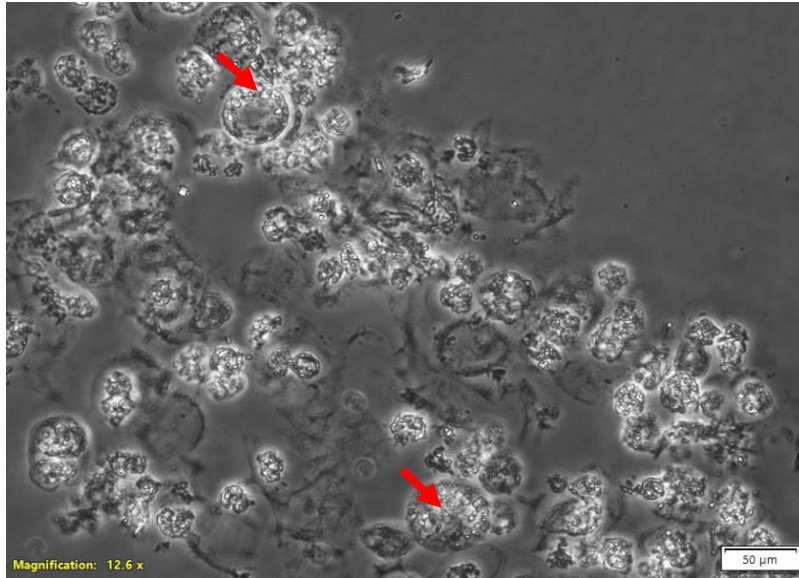

Additional file 3: Figure S2. Protoplast damage following transfection using polyethylene glycol (PEG). Red Arrow indicates intact protoplasts.
